# Supplementary material for: Developing Tobacco Control Interventions in Permanent Supportive Housing for Formerly Homeless Adults
Source: PubMed Central journal article supplement (PMC6788936; doi:10.1177/1524839919839358), 2019-04-11
Supplement: NIHMS1023962-supplement-Supplemental_Table_S1.pdf [file NIHMS1023962-supplement-Supplemental_Table_S1.pdf]

Table 5. Toolkit strategies

| Barrier identified                                                              | Potential toolkit strategies                                                                                                                                                                                                                                                                                                                                        | Dissemination effort                                                                                                                                                                                                                                                                                                                                                                                                                                                                                                              |
|---------------------------------------------------------------------------------|---------------------------------------------------------------------------------------------------------------------------------------------------------------------------------------------------------------------------------------------------------------------------------------------------------------------------------------------------------------------|-----------------------------------------------------------------------------------------------------------------------------------------------------------------------------------------------------------------------------------------------------------------------------------------------------------------------------------------------------------------------------------------------------------------------------------------------------------------------------------------------------------------------------------|
| Feasibility of implementing smoke-free policies in permanent supportive housing | <ul style="list-style-type: none"> <li>• Encourage voluntary adoption of smoke-free homes</li> <li>• Train staff on how to counsel residents on adoption a smoke-free home</li> <li>• Apply lessons learned from sites that have implemented smoke-free policies</li> <li>• Solicit resident and staff feedback to identify repercussions for violations</li> </ul> | <ul style="list-style-type: none"> <li>• Designate a smoking zone; make reasonable accommodations for individuals with disabilities</li> <li>• Work with city/county officials to get leadership support for implementing smoke-free policies in supportive housing</li> </ul>                                                                                                                                                                                                                                                    |
| Barriers to cessation services and delivery                                     | <ul style="list-style-type: none"> <li>• Incorporate tobacco use screening and brief counseling upon entry into housing</li> <li>• Integrate medical and social services so recommendations for nicotine replacement therapies (NRT) are available for those who want it</li> <li>• Train staff to screen and counsel for tobacco use</li> </ul>                    | <ul style="list-style-type: none"> <li>• Partner with local health care organizations and tobacco control organizations to offer technical assistance and/or capacity building to provide cessation services (e.g., training staff, developing scripts for smoking cessation counseling, linking with health care systems) to supportive housing</li> <li>• Work with substance use programs to advocate for comprehensive treatment of all addictions and the provision of integrated treatment of tobacco dependence</li> </ul> |
| Co-use of tobacco and other substances                                          | <ul style="list-style-type: none"> <li>• Integrate discussions around substance use and mental illness with nicotine dependence</li> <li>• Discuss substance and tobacco use in the context of financial strain</li> </ul>                                                                                                                                          | <ul style="list-style-type: none"> <li>• Train staff to counsel residents on how co-use may threaten housing or financial stability, highlighting potential benefits of smoking cessation including improvements in mental health symptoms and substance use outcomes</li> </ul>                                                                                                                                                                                                                                                  |
